# Supplementary material
Source: HighWire-hosted journal article supplement (https://bmjopen.bmj.com/content/8/4/e020374)
Supplement: inline-supplementary-material-1 [file inline-supplementary-material-1.pdf]

## Consolidated criteria for reporting qualitative studies (COREQ): 32-item checklist

Developed from:

Tong A, Sainsbury P, Craig J. Consolidated criteria for reporting qualitative research (COREQ): a 32-item checklist for interviews and focus groups. *International Journal for Quality in Health Care*. 2007. Volume 19, Number 6: pp. 349 – 357

**YOU MUST PROVIDE A RESPONSE FOR ALL ITEMS. ENTER N/A IF NOT APPLICABLE**

| No. Item                                       | Guide questions/description                                                                                                                              | Reported on Page #                                                        |
|------------------------------------------------|----------------------------------------------------------------------------------------------------------------------------------------------------------|---------------------------------------------------------------------------|
| <b>Domain 1: Research team and reflexivity</b> |                                                                                                                                                          |                                                                           |
| <i>Personal Characteristics</i>                |                                                                                                                                                          |                                                                           |
| 1. Interviewer/facilitator                     | Which author/s conducted the interview or focus group?                                                                                                   | FM                                                                        |
| 2. Credentials                                 | What were the researcher's credentials? E.g. PhD, MD                                                                                                     | PhD                                                                       |
| 3. Occupation                                  | What was their occupation at the time of the study?                                                                                                      | FM; Senior Research Fellow                                                |
| 4. Gender                                      | Was the researcher male or female?                                                                                                                       | Female                                                                    |
| 5. Experience and training                     | What experience or training did the researcher have?                                                                                                     | Ethnographer, trained dementia research, 9 years' experience              |
| <i>Relationship with participants</i>          |                                                                                                                                                          |                                                                           |
| 6. Relationship established                    | Was a relationship established prior to study commencement?                                                                                              | No                                                                        |
| 7. Participant knowledge of the interviewer    | What did the participants know about the researcher? e.g. personal goals, reasons for doing the research                                                 | Personal goal, local rural resident, passionate about dementia care       |
| 8. Interviewer characteristics                 | What characteristics were reported about the interviewer/facilitator? e.g. Bias, assumptions, reasons and interests in the research topic                | Personal interest in dementia care, improving care, sharing best practice |
| <b>Domain 2: study design</b>                  |                                                                                                                                                          |                                                                           |
| <i>Theoretical framework</i>                   |                                                                                                                                                          |                                                                           |
| 9. Methodological orientation and Theory       | What methodological orientation was stated to underpin the study? e.g. grounded theory, discourse analysis, ethnography, phenomenology, content analysis | Social constructivism<br>Ethnography,<br>Cultural activity theory (CHAT)  |

|                                  |                                                                                    |                                                                                                                                                                     |
|----------------------------------|------------------------------------------------------------------------------------|---------------------------------------------------------------------------------------------------------------------------------------------------------------------|
|                                  |                                                                                    | visual mapping techniques                                                                                                                                           |
| <i>Participant selection</i>     |                                                                                    |                                                                                                                                                                     |
| 10. Sampling                     | How were participants selected? e.g. purposive, convenience, consecutive, snowball | purposive, snowball                                                                                                                                                 |
| 11. Method of approach           | How were participants approached? e.g. face-to-face, telephone, mail, email        | Media, information leaflets and reply slips, publicity                                                                                                              |
| 12. Sample size                  | How many participants were in the study?                                           | At least 32 family dyads and 60 providers                                                                                                                           |
| 13. Non-participation            | How many people refused to participate or dropped out? Reasons?                    | Not available at present                                                                                                                                            |
| <i>Setting</i>                   |                                                                                    |                                                                                                                                                                     |
| 14. Setting of data collection   | Where was the data collected? e.g. home, clinic, workplace                         | Family dyads; home, leisure Professional Providers; workplace                                                                                                       |
| 15. Presence of non-participants | Was anyone else present besides the participants and researchers?                  | No                                                                                                                                                                  |
| 16. Description of sample        | What are the important characteristics of the sample? e.g. demographic data, date  | Rural dwellers, dementia, caregivers, providers of care                                                                                                             |
| <i>Data collection</i>           |                                                                                    |                                                                                                                                                                     |
| 17. Interview guide              | Were questions, prompts, guides provided by the authors? Was it pilot tested?      | Family dyad questions co constructed with advisory group members. Pilot tested twice. Professional Provider; Semi-Structured interview schedule Pilot tested twice. |
| 18. Repeat interviews            | Were repeat inter views carried out? If yes, how many?                             | Family dyad; up to 3 times                                                                                                                                          |
| 19. Audio/visual recording       | Did the research use audio or visual recording to collect the data?                | Audio recorded                                                                                                                                                      |
| 20. Field notes                  | Were field notes made during and/or after the inter view or focus group?           | Yes if necessary when not possible to audio record.                                                                                                                 |
| 21. Duration                     | What was the duration of the inter views or focus group?                           | 45mins                                                                                                                                                              |
| 22. Data saturation              | Was data saturation discussed?                                                     | N/A                                                                                                                                                                 |
| 23. Transcripts returned         | Were transcripts returned to participants for comment and/or correction?           | No but content could be                                                                                                                                             |

|                                        |                                                                                                                                 |                                                               |
|----------------------------------------|---------------------------------------------------------------------------------------------------------------------------------|---------------------------------------------------------------|
|                                        |                                                                                                                                 | discussed for clarification                                   |
| <b>Domain 3: analysis and findings</b> |                                                                                                                                 |                                                               |
| <i>Data analysis</i>                   |                                                                                                                                 |                                                               |
| 24. Number of data coders              | How many data coders coded the data?                                                                                            | Family dyad coding by FM<br>Professionals coding by FM and AG |
| 25. Description of the coding tree     | Did authors provide a description of the coding tree?                                                                           | N/A                                                           |
| 26. Derivation of themes               | Were themes identified in advance or derived from the data?                                                                     | Themes to be derived from data                                |
| 27. Software                           | What software, if applicable, was used to manage the data?                                                                      | NVivo 11                                                      |
| 28. Participant checking               | Did participants provide feedback on the findings?                                                                              | N/A at this stage.                                            |
| <i>Reporting</i>                       |                                                                                                                                 |                                                               |
| 29. Quotations presented               | Were participant quotations presented to illustrate the themes/findings? Was each quotation identified? e.g. participant number | N/A at this stage.                                            |
| 30. Data and findings consistent       | Was there consistency between the data presented and the findings?                                                              | N/A at this stage.                                            |
| 31. Clarity of major themes            | Were major themes clearly presented in the findings?                                                                            | N/A at this stage.                                            |
| 32. Clarity of minor themes            | Is there a description of diverse cases or discussion of minor themes?                                                          | N/A at this stage.                                            |

**Once you have completed this checklist, please save a copy and upload it as part of your submission. When requested to do so as part of the upload process, please select the file type: *Checklist*. You will NOT be able to proceed with submission unless the checklist has been uploaded. Please DO NOT include this checklist as part of the main manuscript document. It must be uploaded as a separate file.**
